# Supplementary material for: A Complete Molecular Diagnostic Procedure for Applications in Surveillance and Subtyping of Avian Influenza Virus
Source: Hindawi journal article supplement (doi:10.1155/2014/653056), 2014-01-01
Supplement: f1 [file 653056.f1.pdf]

Supplementary Table 1. List of subtyping primer panel

| Primer        | Primer Sequence <sup>a</sup> (5' to 3') | Expected product size (bp) |
|---------------|-----------------------------------------|----------------------------|
| H1qPCR-417f   | CATGGCCAAAYCATGAGACAAC                  | 234(417-650)               |
| H1qPCR-650r   | ARACRTATGCATCAGYGTCTGGTA                |                            |
| H2qPCR-330f   | AYCCAGGCAGTTTCAATGATTATG                | 183(330-512)               |
| H2qPCR-512r   | TCTTTGTMARCCARACCATGTTC                 |                            |
| H3qPCR-209f   | GRCGRGACTGCACACTRATAGATGC               | 220(209-428)               |
| H3qPCR-428r   | CCATTYTGAGTGACTCCTGTCCA                 |                            |
| H4qPCR-311f   | ACTTGYTAYCCATTTGATGTGCCAGA              | 271(311-581)               |
| H4qPCR-581r   | GATGRTGAACTCCCCAKATGTAAAG               |                            |
| H5qPCR-1475f  | CCGCAGTATTCAGAAGARGC                    | 140 (1475-1614)            |
| H5qPCR-1614r  | AGACCAGCYAYCATGATTGC                    |                            |
| H6qPCR-696f   | GMAGAATTGATTATTAYTGGTCTGT               | 250(696-945)               |
| H6qPCR-945r   | ACATATTTGGGGCATTCTCCWATCCA              |                            |
| H7qPCR-950f   | GGCAACAGGRATGAAGAAAYGTTCC               | 97(950-1046)               |
| H7qPCR-1046r  | AATCAGACCTTCCCATCCATTTTC                |                            |
| H8qPCR-154f   | ATTGGAAGCTGCGAGACTGCA                   | 236(154-389)               |
| H8qPCR-389r   | CAGAGCKAGTYACATTCCAYCTGG                |                            |
| H9qPCR-115f   | CACATRCCAAAGAATTRCTCCA                  | 166(115-280)               |
| H9qPCR-280r   | CTTTCRACRATGTAGGACCATT                  |                            |
| H10qPCR-1026f | ATAGAAAAYGGATGGGAAGGRAT                 | 300(1026-1325)             |
| H10qPCR-1325r | GTCAATTGTRTGCTGATTYTCAT                 |                            |
| H11qPCR-259f  | ACWTCATGGTCYTACATWGT                    | 243(259-501)               |
| H11qPCR-501r  | TGATTGRTGTATCARCCATAACCATG              |                            |
| H12qPCR-165f  | CTAGTGCTYGATGACTGTTCATTAGA              | 209(165-373)               |
| H12qPCR-373r  | AAATCAAACATCTTCACTCTTTCATAYT            |                            |
| H13qPCR-151f  | GACWAACCACACAGGAACATATTG                | 233(151-383)               |
| H13qPCR-383r  | TGAAHGATYTGATTCCACTGAACA                |                            |
| H14qPCR-161f  | CACACTGATGAACTGTGCCCAA                  | 193(161-353)               |
| H14qPCR-353r  | TGCTTCTGAGACTCTGGTAATCTG                |                            |
| H15qPCR-184f  | TGTGGAATACTGGGAACATCATTG                | 237(184-420)               |
| H15qPCR-420r  | TGTTCTTTACACGCACTGGTTG                  |                            |
| H16qPCR-649f  | ACAYTRGTATCAACAAAAGARTGGA               | 242(649-890)               |
| H16qPCR-890r  | TGRCAYTTTGTGTTGCATTTRG                  |                            |
| N1qPCR-477f   | GTTTGAGTCTGTTGCTTGGTC                   | 190(477-666)               |
| N1qPCR-666r   | GCCATTTACACATGCACATTCAG                 |                            |
| N2qPCR-420f   | TGCATAGCATGGTCCAGCTCAAG                 | 216(420-635)               |

|             |                          |              |
|-------------|--------------------------|--------------|
| N2qPCR-635r | AGCACTTCCATCAGTCATTACTAC |              |
| N3qPCR-614f | ATGACAGACTCCATTAAATCATG  | 256(614-869) |
| N3qPCR-869r | TCCAATTGTCCCTACATATRCAGT |              |
| N4qPCR-605f | YATTATGCGAACACAAGAGTC    | 270(605-874) |
| N4qPCR-874r | TAATCAAGATCACTGTTGAATC   |              |
| N5qPCR-120f | ACAATGAAACTGTRAGGCTGGAA  | 162(120-281) |
| N5qPCR-281r | CWATTCTGATYCCATTGTCCTTG  |              |
| N6qPCR-232f | TRTGTGAAGTAAACTCATGGCA   | 181(232-412) |
| N6qPCR-412r | TCATGTATRGTCCCATTTGCATG  |              |
| N7qPCR-442f | GGTCMAGCACHAGTTGCCATGA   | 172(442-613) |
| N7qPCR-613r | CCATTGTGRCATACACATTC     |              |
| N8qPCR-153f | GGTAACWCAATGGCACAATAC    | 153(153-305) |
| N8qPCR-305r | ACATGWCCTCTSGAWCCAATTC   |              |
| N9qPCR-521f | AAGYACTAGTTGCCATGATG     | 206(521-726) |
| N9qPCR-726r | CAGTGGCRGACCCATCTGTGA    |              |

---

<sup>a</sup> Codes for mixed bases position: R=A/G, Y=C/T, M=A/C, K=G/T, S=C/G, W=A/T, H=A/C/T.

Supplementary Table 2. Primers list for HA and NA gene segments sequencing of avian influenza A viruses by traditional PCR

| Primer       | Primer sequence <sup>a</sup> (5' to 3') | Expected product size (bp)            | Number of sequences considered for primer design <sup>d</sup> |
|--------------|-----------------------------------------|---------------------------------------|---------------------------------------------------------------|
| H1-uni-f     | CAAAGCAGGGGAWAATCAAATCAAYCAA            | 1124 <sup>b</sup> / 1716 <sup>c</sup> | 74                                                            |
| H1-mid-1123r | CABCCATCTATCATKCCTGTCCATCC              |                                       |                                                               |
| H1-mid-823f  | ATAACRTTYGARGCMACYGGRAA                 | 918                                   |                                                               |
| H1-uni-r     | CATTGYAAWGACCCATTAGARCACATCCA           |                                       |                                                               |
| H2-uni-f     | CAAAGCAGGGGTTATACCATRGACAA              | 1126 / 1711                           | 67                                                            |
| H2-mid-1118r | TACCARCCATCAAYCATYCCTTGCCA              |                                       |                                                               |
| H2-mid-842f  | GCACCAGAATAYGGWTTCAAATATC               | 884                                   |                                                               |
| H2-uni-r     | TGCAGAGAYCCRTRRGARCACATCCA              |                                       |                                                               |
| H3-uni-f     | AGCAAAAGCAGGGGATAHTT                    | 1092 / 1736                           | 186                                                           |
| H3-mid-1099r | CCTTCCCATCCATTTTCAATAAA                 |                                       |                                                               |
| H3-mid-932f  | ATCACTCCWAATGGDAGCATYCCMAA              | 813                                   |                                                               |
| H3-uni-r     | ACTCAAATGCAAATGTTGCACCTAATRRTGCC        |                                       |                                                               |
| H4-uni-f     | CAAAGCAGGGGAAACAATGCTATCAAT             | 907 / 1730                            | 140                                                           |
| H4-mid-884r  | GTGTGRCATTTRCTRACRCADGAKCCTAT           |                                       |                                                               |
| H4-mid-737f  | CAAAGYGGYAGRATHAGYTTYTAYTGGAC           | 999                                   |                                                               |
| H4-uni-r     | CAAGGGTGTTTTTCTYYAAATRCAAATCTG          |                                       |                                                               |
| H5-uni-f     | CAGGGGTTCAATCTGTCAAAATGGA               | 928 / 1764                            | 1192                                                          |
| H5-mid-911r  | GAGTTTATCGCMCCYATTGGAGTTTGA             |                                       |                                                               |
| H5-mid-815f  | CCAGAAWATGCATACAAAATTGTCAARAA           | 949                                   |                                                               |
| H5-uni-r     | ACAAGGGTGTTTTTAACTACAATCTGAACTC         |                                       |                                                               |
| H6-uni-f     | AGCAAAAGCAGGGGAAAATGATTGCA              | 985 / 1702                            | 261                                                           |
| H6-mid-996r  | TTKGGRCATTYCCWATCCA                     |                                       |                                                               |
| H6-mid-807f  | AATGGAAAYCTAATYGCYCCTTGGTATGC           | 902                                   |                                                               |
| H6-uni-r     | TGCATTGAACCATTCGARCACATCCA              |                                       |                                                               |
| H7-uni-f     | CAAAGCAGGGGATACRAAATGAACA               | 1082 / 1704                           | 311                                                           |
| H7-mid-1074r | CTTCCCAYCCATTTTCAATRAAWCCHGC            |                                       |                                                               |
| H7-mid-784f  | TTCAATGGGGCHTTYATAGCYCC                 | 920                                   |                                                               |
| H7-uni-r     | ACTTATATACAAATAGTGCACCGCATGT            |                                       |                                                               |
| H8-uni-f     | AGCAAAAGCAGGGGTCACAATGGAGAA             | 947 / 1718                            | 17                                                            |
| H8-mid-920r  | GAAAGGGTTTGCTGCTATTRATTGCTCC            |                                       |                                                               |
| H8-mid-639f  | CTRTAYAARAATGCAAACACTTTGAGTAGTGT        | 1081                                  |                                                               |
| H8-uni-r     | AAATACAGAACATGCATCTACAAGATCCAT          |                                       |                                                               |
| H9-uni-f     | AGCAAAAGCAGGGGAA                        | 956 / 1701                            | 318                                                           |

|               |                                       |             |     |
|---------------|---------------------------------------|-------------|-----|
| H9-mid-952r   | TTRCTKAYATTKTGRAAHGGCAA               |             |     |
| H9-mid-694f   | TTCAAACCADTAATAGGGCCAAGGCC            | 1008        |     |
| H9-uni-r      | GCATCTGCAAGATCCATTGGACAT              |             |     |
| H10-uni-f     | CAAAGCAGGGGTCACAATGTACAA              | 901 / 1695  | 58  |
| H10-mid-878r  | CCYTTCCAAAAACATTTDGATTCCACA           |             |     |
| H10-mid-709f  | CAAGACCWCARGTSAATGGHCAAAGT            | 993         |     |
| H10-uni-r     | AGATTGTGCATCGCATGTTTCCAT              |             |     |
| H11-uni-f     | AGCAAAAAGCAGGGGAAATATCAAGAAAT         | 771 / 1731  | 67  |
| H11-mid-744r  | TCCARTARAAGKGCATTCKYCCAGCCT           |             |     |
| H11-mid-569f  | TTCAACAACACCAAAGGAAGAGATGT            | 1162        |     |
| H11-uni-r     | TTTAAATGCAAATGGTACATCTACATGA          |             |     |
| H12-uni-f     | AGCAAAAAGCAGGGGTCACAATGGARAARTTCAT    | 1080 / 1737 | 25  |
| H12-mid-1049r | CCTTCTATRAARCCWGCAATTGCTCCAAAGAG      |             |     |
| H12-mid-730f  | ACARCARGGGAGAATGGATTAYTAYTGGGC        | 1008        |     |
| H12-uni-r     | AGTAGAAACAAGGGTGTTTTTAATTAATACAGA     |             |     |
| H13-uni-f     | AGCAAAAAGCAGGGGAAAATHYWAYAA           | 945 / 1774  | 25  |
| H13-mid-918r  | CCRACMGAWGTCTGRCAYTTRGTRTTGCA         |             |     |
| H13-mid-747f  | CCTGGCTATAATGGACAGAGGAGCTGGATGA       | 1029        |     |
| H13-uni-r     | AGTAGAAACAAGGGTGTTTTTTCTAYTTATATACA   |             |     |
| H14-uni-f     | GCAGGGGAAAATGATTGCACTCA               | 974 / 1741  | 2   |
| H14-mid-945r  | TTCCTATAGCAATCCTTGATACATTCTGAAAAGGTTT |             |     |
| H14-mid-776f  | AGTAAACCCAGGGGACTCCA                  | 973         |     |
| H14-uni-r     | AGTAGAAACAAGGGTGTTTTTTCTTTATATACAGAT  |             |     |
| H15-uni-f     | AGGGGAWACAAAATGAACACTCAAATCAT         | 921 / 1754  | 5   |
| H15-mid-905r  | ACTGTAGAAGCATTCCCCCTTCACAT            |             |     |
| H15-mid-780f  | ATGGTGCATTCATAGCCCCAGATA              | 973         |     |
| H15-uni-r     | AGTAGAAACAAGGGTGTTTTTTCAAATAATTATA    |             |     |
| H16-uni-f     | AGCAAAAAGCAGGGGATATTGTCAA             | 1082 / 1762 | 13  |
| H16-mid-1060r | CAATTGCACCAAACARDCCCTTTTCA            |             |     |
| H16-mid-903f  | GGCCAAATGCAACACAAAGTG                 | 865         |     |
| H16-uni-r     | AGTAGAAACAAGGGTRTTTTTTTYCYDAYTATATA   |             |     |
| N1-uni-f      | AGCAAAAAGCAGGAGWYAAAATGAATC           | 929 / 1425  | 919 |
| N1-mid-1030r  | CCAYGGYCKATTYGARSCATGCCA              |             |     |
| N1-mid-675f   | CTTGGTCAGCAAGTGCWTGYCATGATG           | 873         |     |
| N1-uni-r      | TGTCAATGGTGAATGGCARMTCAGC             |             |     |
| N2-uni-f      | AGCAAAAAGCAGGAGTGAAAATGAATCCA         | 699 / 1396  | 834 |
| N2-mid-714r   | TCCTGWGTYCTGAGRATATTTTGRGACCA         |             |     |
| N2-mid-513f   | GTTCCATTYCATTTRGGRACCARACAAGT         | 885         |     |

|              |                                   |             |     |
|--------------|-----------------------------------|-------------|-----|
| N2-uni-r     | AGGCCATGAGCCTGTTCCA               |             |     |
| N3-uni-f     | AGCAAAAGCAGGTGCGAGATGA            | 926 / 1384  | 157 |
| N3-mid-978r  | GGYCTGTTRGARCCYTTCCARTTGTCYCT     |             |     |
| N3-mid-668f  | ATAATRTATGCAGGGAYAATGMSAGACTC     | 748         |     |
| N3-uni-r     | ATCCAGGTTTCATTGTCTARYCCACAGAA     |             |     |
| N4-uni-f     | AGCAAAAGCAGGAGWTTTCATAATGAAYCCRAA | 1106 / 1442 | 24  |
| N4-mid-1084r | CTYCCTATCCAAACWCCATCYCCATA        |             |     |
| N4-mid-677f  | GAARGGMAAYATYATGCGAACACAAGAGTC    | 768         |     |
| N4-uni-r     | TCGAAAAATYACTTGTCTATGTCAAADGGCA   |             |     |
| N5-uni-f     | AGCAAAAGCAGGAGTTTAAAATGAATCCA     | 913 / 1441  | 47  |
| N5-mid-883r  | CTATTCATTCCRTTCCAATTRTCYCKGCAAAC  |             |     |
| N5-mid-724f  | TGTTATTGGGTAATGACRGATGGTCC        | 719         |     |
| N5-uni-r     | TACATCTTATCGATGTCAAAGGWAGAATTGC   |             |     |
| N6-uni-f     | AGCAAAAGCAGGGTGAAAATGAATCCA       | 926 / 1421  | 126 |
| N6-mid-879r  | GGTCTATTTGCHCCYTTCCAATTGT         |             |     |
| N6-mid-605f  | ACCTAAYAAYAATGCWTCRGCWGTRGTVTGGTA | 810         |     |
| N6-uni-r     | ATGATTTTCAGCMCCATCATGCCA          |             |     |
| N7-uni-f     | AGCAAAAGCAGGGTGATYGAGAATGAAT      | 925 / 1412  | 62  |
| N7-mid-942r  | GGYCTRRTTWGICYCCYTGCCA            |             |     |
| N7-mid-621f  | CARGGRAATAATRAYAAYGCWACAGC        | 807         |     |
| N7-uni-r     | ATCGGGGAARGAACCGGA                |             |     |
| N8-uni-f     | AGCAAAAGCAGGAGTTTAAAATGAATCCAA    | 754 / 1411  | 159 |
| N8-mid-762r  | GCKGGTCCRTCHGTCATYACCCA           |             |     |
| N8-mid-597f  | TGYCAYGATGGRAAGAARTGGATGA         | 848         |     |
| N8-uni-r     | GGAAGAATAGCTCCATCRTGCCA           |             |     |
| N9-uni-f     | AGCAAAAGCAGGGTCAAGATGAATCCAAATCA  | 914 / 1432  | 63  |
| N9-mid-906r  | CCYTGCCAATTRTCYCTRCAAYGTGCA       |             |     |
| N9-mid-566f  | GGDTGGTCMAGYACWAGYTGAYCAYGATGG    | 880         |     |
| N9-uni-r     | CTTAGAGRAAGTACTCTATTTTAGCCCCATC   |             |     |

<sup>a</sup> Codes for mixed bases position: R=A/G, Y=C/T, M=A/C, K=G/T, S=C/G, W=A/T, D=G/A/T, B=G/C/T, H=A/C/T, V=A/C/G.

<sup>b</sup> Product size of partial 1 segment.

<sup>c</sup> Product size of full length segment.

<sup>d</sup> Sequences were retrieved from the GenBank provided by NCBI, USA.
